# Supplementary material for: Adsorption of antimicrobial peptide onto chitosan-coated iron oxide nanoparticles fosters oxidative stress triggering bacterial cell death
Source: Royal Society of Chemistry journal article supplement (doi:10.1039/d3ra04070d), 2023-01-01
Supplement: d3ra04070d1.pdf [file d3ra04070d1.pdf]

## Supplementary information

### Adsorption of antimicrobial peptide onto chitosan coated iron oxide nanoparticles fosters oxidative stress triggering bacterial cell death

Lipsa Leena Panigrahi<sup>a</sup>, Shashank Shekhar<sup>b</sup>, Banishree Sahoo<sup>a</sup>, Manoranjan Arakha<sup>a\*</sup>

<sup>a</sup>. Center for Biotechnology, Siksha 'O' Anusandhan (Deemed to be University), Bhubaneswar, 751003, Odisha, India. E-mail: marakha@soa.ac.in  
<sup>b</sup>. Indian Institute of Technology, Hyderabad, India

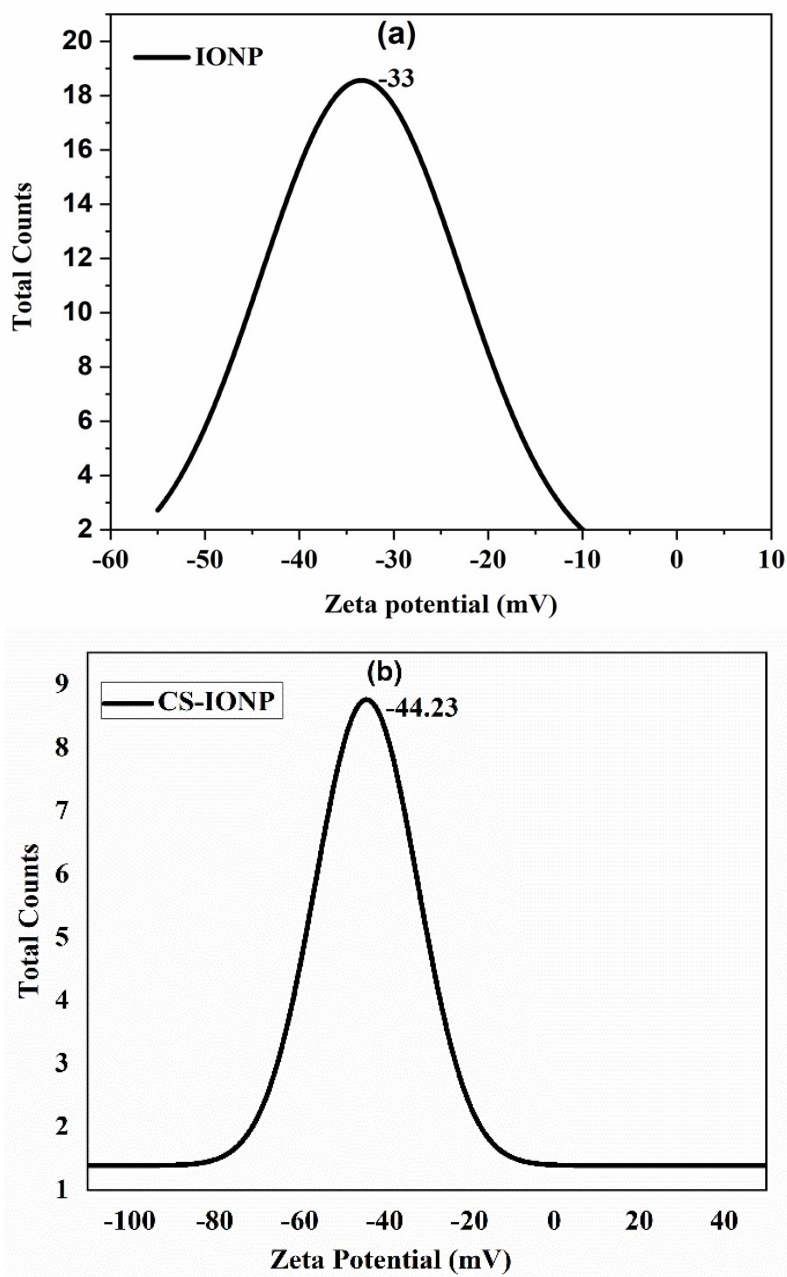

Fig. S 1. Zeta potential analysis of (a) Iron oxide nanoparticles (-33 mV) (b) Chitosan coated Iron oxide nanoparticles (CS-IONP) (-44.23 mV)
